# Supplementary material for: Ethnobotanical Documentation of the Uses of Wild and Cultivated Plants in the Ansanto Valley (Avellino Province, Southern Italy)
Source: MDPI journal article supplement (doi:10.3390/plants12213690), 2023-10-26
Supplement: s1 [file s1]

Table S1. Traditionally used plants in the areas of Ansanto Valley (U.R.: Use Reports; Cos: cosmetic uses; Cul: culinary uses; Med: medicinal uses; Vet: veterinary uses).

| Name<br>(Family)                                         | Vernacular name                              | Parts used               | Preparation                                                                                                        | Administration | Use                                                                    | U.R. |
|----------------------------------------------------------|----------------------------------------------|--------------------------|--------------------------------------------------------------------------------------------------------------------|----------------|------------------------------------------------------------------------|------|
| <i>Achillea millefolium</i> L.<br>(Asteraceae) AV-001    | Achiella, Evera<br>d'Autiello                | Flowers                  | Decoction                                                                                                          | Oral           | <b>Med:</b> ulcers                                                     | 1    |
|                                                          |                                              |                          | Infusion                                                                                                           |                | <b>Med:</b> varicose<br>veins                                          | 1    |
|                                                          |                                              | Whole plant              | Decoction                                                                                                          |                | <b>Med:</b> gastritis                                                  | 1    |
|                                                          |                                              |                          |                                                                                                                    |                | <b>Vet:</b> against the<br>intestinal<br>parasites of<br>calves        | 1    |
| <i>Agrimonia eupatoria</i> L.<br>(Rosaceae) AV-002       | Erba delle scottature,<br>evera de lu cuotto | Stem, Leaves,<br>Flowers | The dried and finely chopped<br>plant is toasted, then mixed<br>with (or without) lard and<br>applied on the burns | Topical        | <b>Med:</b> burns                                                      | 6    |
| <i>Allium sativum</i> L.<br>(Amaryllidaceae) AV-003      | Agghie, Aglio                                | Bulbs                    | Raw                                                                                                                | Oral           | <b>Med:</b> intestinal<br>disinfectant,<br>against<br>intestinal worms | 5    |
|                                                          |                                              |                          | Raw bulbs crushed in a mortar<br>with rue leaves and then<br>filtered                                              | Topical        | <b>Med:</b> blood<br>pressure                                          | 4    |
|                                                          |                                              |                          |                                                                                                                    |                | <b>Med:</b><br>antimicrobial                                           | 2    |
|                                                          |                                              |                          |                                                                                                                    |                | <b>Med:</b> tonic                                                      | 1    |
|                                                          |                                              |                          |                                                                                                                    |                | <b>Med:</b> stomach<br>and belly ache                                  | 5    |
|                                                          |                                              |                          | Raw                                                                                                                |                | <b>Med:</b> insect bites                                               | 3    |
|                                                          |                                              |                          | Raw bulbs crushed with olive<br>oil                                                                                |                | <b>Med:</b> to remove<br>calluses                                      | 1    |
|                                                          |                                              |                          | Raw                                                                                                                |                | <b>Dom:</b> insects<br>repellent                                       | 2    |
| <i>Aloe arborescens</i> Mill.<br>(Asphodelaceae) AV-004  | Aloe                                         | Mucilaginous<br>tissue   | Raw                                                                                                                | Topical        | <b>Dom:</b> bulbs<br>carried in a<br>pocket to keep<br>snakes away     | 1    |
|                                                          |                                              |                          |                                                                                                                    |                | <b>Med:</b> burns                                                      | 2    |
|                                                          |                                              |                          |                                                                                                                    |                | <b>Med:</b> skin<br>lenitive                                           | 1    |
|                                                          |                                              |                          |                                                                                                                    |                | <b>Med:</b> insect bites                                               | 1    |
|                                                          |                                              |                          |                                                                                                                    |                | <b>Med:</b> to heal<br>sores in the<br>mouth                           | 1    |
| <i>Apium graveolens</i> L.<br>(Apiaceae) AV-005          | Sedano selvatico                             | Stem, leaves             |                                                                                                                    |                | <b>Cos:</b> skin tonic                                                 | 1    |
| <i>Artemisia absinthium</i> L.<br>(Asteraceae) AV-006    | Assenzio, Nascienzo                          | Leaves                   | Decoction                                                                                                          | Oral           | <b>Cul:</b> as<br>vegetable,<br>aromatizer                             | 2    |
|                                                          |                                              | Leaves,<br>Flowers       | Infusion                                                                                                           |                | <b>Med:</b> intestinal<br>warms                                        | 2    |
|                                                          |                                              | Flowers                  | Macerate (in wine)                                                                                                 |                | <b>Med:</b> febrifuge,<br>antiseptic                                   | 2    |
|                                                          |                                              | Leaves                   | Liquor                                                                                                             |                | <b>Med:</b> aperitif                                                   | 1    |
| <i>Arundo donax</i> L.<br>(Poaceae) AV-007               | Canne                                        | Leaves                   |                                                                                                                    |                | <b>Med:</b> digestive                                                  | 1    |
|                                                          |                                              | Stems                    |                                                                                                                    |                | <b>Dom:</b> baskets                                                    | 4    |
| <i>Asparagus acutifolius</i> L.<br>(Asparagaceae) AV-008 | Asparagi, Sparici                            | Turions                  | Cooking water                                                                                                      | Oral           | <b>Med:</b> diuretic                                                   | 2    |

|                                                                                                       |                                         |                        |                                                                                |         |                                                                                  |        |
|-------------------------------------------------------------------------------------------------------|-----------------------------------------|------------------------|--------------------------------------------------------------------------------|---------|----------------------------------------------------------------------------------|--------|
|                                                                                                       |                                         |                        | Eaten cooked                                                                   |         | <b>Med:</b> iron supplements                                                     | 1      |
|                                                                                                       |                                         |                        |                                                                                |         | <b>Cul:</b> as vegetable                                                         | 4      |
| <i>Avena sativa</i> L.<br>(Poaceae) AV-009                                                            | Avena                                   | Fruits                 | Boiled with barley, the water is drunk warm<br>Boiled, the water is drunk warm | Oral    | <b>Med:</b> lower cholesterol                                                    | 1      |
|                                                                                                       |                                         | Stems                  |                                                                                |         | <b>Med:</b> sedative                                                             | 1      |
|                                                                                                       |                                         |                        |                                                                                |         | <b>Dom:</b> straw sculptures                                                     | 1      |
|                                                                                                       |                                         |                        |                                                                                |         | <b>Dom:</b> drinking straws                                                      | 1      |
| <i>Bellis perennis</i> L.<br>(Asteraceae) AV-010                                                      | Margherita, Margheritine, Margarita     | Leaves                 | The raw leaves are crushed and applied topically                               | Topical | <b>Med:</b> pimples healing                                                      | 3      |
|                                                                                                       |                                         | Leaves, Flowers        | Decoction                                                                      | Oral    | <b>Med:</b> mouth and throat inflammations                                       | 2      |
|                                                                                                       |                                         | Whole plant            |                                                                                |         | <b>Med:</b> to treat acne                                                        | 1      |
|                                                                                                       |                                         | Flowers                | Infusion<br>Infusion                                                           | Topical | <b>Med:</b> refreshing<br><b>Cosm:</b> to make eyes bright                       | 1<br>1 |
|                                                                                                       |                                         | Whole plant            | Decoction in milk                                                              |         | <b>Cos:</b> facial cleansing                                                     | 1      |
| <i>Beta vulgaris</i> L. subsp. <i>maritima</i> (L.) Arcang.<br>(Amaranthaceae) AV-011                 | Bietola, Ieta                           | Leaves                 | Decoction                                                                      | Oral    | <b>Med:</b> rheumatism                                                           | 1      |
|                                                                                                       |                                         |                        |                                                                                |         | <b>Med:</b> blood circulation                                                    | 1      |
|                                                                                                       |                                         |                        |                                                                                |         | <b>Med:</b> diuretic                                                             | 1      |
|                                                                                                       |                                         |                        |                                                                                |         | <b>Cul:</b> as vegetable                                                         | 12     |
| <i>Borago officinalis</i> L.<br>(Boraginaceae) AV-012                                                 | Borragine, Vorraine, Vorraina, Borraine | Leaves                 | Decoction                                                                      | Oral    | <b>Med:</b> rheumatism                                                           | 3      |
|                                                                                                       |                                         |                        |                                                                                |         | <b>Med:</b> blood circulation                                                    | 1      |
|                                                                                                       |                                         |                        |                                                                                |         | <b>Med:</b> cough                                                                | 1      |
|                                                                                                       |                                         |                        |                                                                                |         | <b>Cos:</b> skin purification                                                    | 1      |
|                                                                                                       |                                         |                        | Raw in the feed                                                                |         | <b>Vet:</b> galactagogue for cows                                                | 2      |
|                                                                                                       |                                         |                        |                                                                                |         | <b>Cul:</b> as vegetable                                                         | 17     |
| <i>Brassica oleracea</i> L.<br>(Brassicaceae) AV-013                                                  | Cavolo selvatico                        | Leaves                 | Crushed ina mortar                                                             | Topical | <b>Med:</b> burns                                                                | 1      |
|                                                                                                       |                                         | Leaves, flowers        |                                                                                |         | <b>Cul:</b> as vegetable ("Pizza gialla", "Pizza e minestra", "Pizza sciatizza") | 2      |
| <i>Brassica cretica</i> Lam. [B. <i>oleracea</i> L. var. <i>botrytis</i> L.]<br>(Brassicaceae) AV-014 | Cavolfiore                              | Leaves                 | Crushed and applied to the knee                                                | Topical | <b>Med:</b> synovitis                                                            | 1      |
| <i>Brassica rapa</i> L.<br>(Brassicaceae) AV-015                                                      |                                         |                        |                                                                                |         | <b>Cul:</b> as vegetable in pizzas                                               | 1      |
| <i>Calendula officinalis</i> L.<br>(Asteraceae) AV-016                                                | Calendula                               | Flowers                | Infusion                                                                       | Oral    | <b>Med:</b> sedative, headache                                                   | 1      |
|                                                                                                       |                                         | Stems, Leaves, Flowers | Crushed in a mortar and topically applied                                      | Topical | <b>Med:</b> burns                                                                | 1      |

|                                                                 |                   |                                        |                                                                                                                          |         |                                                                        |         |
|-----------------------------------------------------------------|-------------------|----------------------------------------|--------------------------------------------------------------------------------------------------------------------------|---------|------------------------------------------------------------------------|---------|
| <i>Camellia sinensis</i> (L.) Kuntze<br>(Theaceae)              | Tè nero           | Leaves                                 |                                                                                                                          |         | <b>Cul:</b> as vegetable                                               | 1       |
|                                                                 |                   | Flowers                                | Petals crushed in a mortar and used as saffron                                                                           |         | <b>Cul:</b> as spice                                                   | 1       |
|                                                                 |                   | Leaves                                 | Boiled in the water                                                                                                      |         | <b>Dom:</b> fabric dye                                                 | 1       |
| <i>Cannabis sativa</i> L.<br>(Cannabaceae) AV-017               | Canapa            | Stems                                  | The fibers kneaded with egg and sugar to block the joints in case of sprains                                             | Topical | <b>Med:</b> sprains                                                    | 5       |
| <i>Capparis spinosa</i> L.<br>(Capparaceae) AV-018              | Capperi           | Flowers                                | Fresh flowers chewed                                                                                                     |         | <b>Med:</b> toothaches                                                 | 2       |
|                                                                 |                   | Stems                                  | Stems are soaked in water streams, then dried, broken and scutched to separate the desired fibers from hemp's woody core |         | <b>Dom:</b> for making ropes, fabrics, tow, sheets, seamless stockings | 5       |
|                                                                 |                   | Tips of the branches, immature fruits. |                                                                                                                          | Brine   | <b>Cul:</b> flavoring                                                  | 1       |
| <i>Capsicum annuum</i> L. [C. longum L.]<br>(Solanaceae) AV-019 | Peperoncino       | Flower buds                            |                                                                                                                          | Salted  | <b>Cul:</b> flavoring                                                  | 3       |
|                                                                 |                   | Fruits, seeds                          | Raw                                                                                                                      | Oral    | <b>Med:</b> coronary arteries cleansing<br><b>Cul:</b> condiment       | 1<br>13 |
| <i>Castanea sativa</i> Mill.<br>(Fagaceae) AV-020               | Castagne          | Seeds                                  | Decoction with barley and a not identified "erba dei muretti"                                                            | Oral    | <b>Med:</b> to calm cough                                              | 1       |
| <i>Centaureum erythraea</i> Rafn.<br>(Gentianaceae) AV-021      | Centaurea         | Flowered aerial parts                  | Decoction                                                                                                                | Oral    | <b>Med:</b> febrifuge                                                  | 3       |
| <i>Chelidonium majus</i> L.<br>(Papaveraceae) AV-022            | Celidonia         | Latex                                  | Raw                                                                                                                      | Topical | <b>Med:</b> to remove thorns under the skin<br><b>Med:</b> warts       | 1<br>4  |
| <i>Chenopodium album</i> L.<br>(Amaranthaceae) AV-023           | Farinole          | Leaves                                 | Infusion                                                                                                                 | Oral    | <b>Med:</b> diuretic                                                   | 1       |
|                                                                 |                   | Leaves                                 |                                                                                                                          |         | <b>Cul:</b> as vegetable                                               | 3       |
| <i>Chenopodium bonus-enricus</i> L.<br>(Amaranthaceae) AV-024   | Orapi             | Leaves                                 |                                                                                                                          |         | <b>Cul:</b> as vegetable                                               | 1       |
| <i>Cichorium intybus</i> L.<br>(Asteraceae) AV-025              | Cicoria, Cectoria | Leaves                                 | Decoction                                                                                                                | Oral    | <b>Med:</b> liver depurative                                           | 8       |
|                                                                 |                   |                                        |                                                                                                                          |         | <b>Med:</b> diuretic                                                   | 4       |
|                                                                 |                   |                                        |                                                                                                                          |         | <b>Med:</b> digestive                                                  | 2       |
|                                                                 |                   |                                        |                                                                                                                          |         | <b>Med:</b> cure the after-effects of bronchitis                       | 2       |
|                                                                 |                   |                                        |                                                                                                                          |         | <b>Med:</b> viral infections                                           | 2       |
|                                                                 |                   |                                        |                                                                                                                          |         | <b>Med:</b> invigorating                                               | 2       |
|                                                                 |                   |                                        |                                                                                                                          |         | <b>Med:</b> diabetes                                                   | 1       |
|                                                                 |                   |                                        |                                                                                                                          |         | <b>Med:</b> lower cholesterol                                          | 2       |
|                                                                 |                   |                                        |                                                                                                                          |         | <b>Med:</b> blood pressure                                             | 2       |
|                                                                 |                   |                                        |                                                                                                                          |         | <b>Med:</b> purify blood after hangover                                | 1       |

|                                                                                |                                             |               |                                                                         |                                |                                                               |           |
|--------------------------------------------------------------------------------|---------------------------------------------|---------------|-------------------------------------------------------------------------|--------------------------------|---------------------------------------------------------------|-----------|
|                                                                                |                                             |               |                                                                         |                                | <b>Cul:</b> as vegetable in soups and pizzas                  | <b>22</b> |
|                                                                                |                                             | Roots         | Dried roots are ground and used as coffee powder                        |                                | <b>Cul:</b> coffee                                            | <b>3</b>  |
| <i>Citrus x limon</i> (L.) Osbeck (Rutaceae) AV-026                            | Limone                                      | Fruit         | Juice in hot water                                                      | Oral                           | <b>Med:</b> dysentery                                         | <b>1</b>  |
|                                                                                |                                             |               | Juice added to coffee (no sugar)                                        |                                | <b>Med:</b> headache                                          | <b>1</b>  |
|                                                                                |                                             |               | Lemon and pomegranate juice                                             |                                | <b>Med:</b> refreshing                                        | <b>1</b>  |
|                                                                                |                                             |               | Liquor                                                                  |                                | <b>Med:</b> digestive                                         | <b>1</b>  |
|                                                                                |                                             |               | Juice with salt                                                         | Topical                        | <b>Med:</b> epistaxis                                         | <b>1</b>  |
|                                                                                |                                             |               | Juice                                                                   |                                | <b>Dom:</b> invisible ink                                     | <b>1</b>  |
|                                                                                |                                             |               | Juice with water and sand                                               |                                | <b>Dom:</b> clean copper pots                                 | <b>2</b>  |
| <i>Clematis vitalba</i> L. (Ranunculaceae) AV-027                              | Vetaglie                                    | Young shoots  |                                                                         |                                | <b>Cul:</b> as vegetable                                      | <b>2</b>  |
| <i>Clinopodium nepeta</i> (L.) Kuntze subsp. <i>nepeta</i> (Lamiaceae) AV-028  | Nepeta                                      | Leaves        |                                                                         |                                | <b>Cul:</b> flavoring                                         | <b>21</b> |
| <i>Coffea arabica</i> L.; <i>C. canephora</i> Pierre ex A.Froehner (Rubiaceae) | Caffè                                       | Seeds         | See <i>Citrus x limon</i>                                               | Oral                           | <b>Med:</b> headache                                          | <b>1</b>  |
| <i>Cucumis sativus</i> L. (Cucurbitaceae)                                      | Cetriolo                                    | Fruits        | Fresh slices on the face                                                | Topical                        | <b>Cos:</b> beauty masks, skin tonic                          | <b>1</b>  |
| <i>Cynara cardunculus</i> L. subsp. <i>cardunculus</i> (Asteraceae) AV-029     | Cardo                                       | Leaves, stems |                                                                         | Oral                           | <b>Vet:</b> goat feed                                         | <b>3</b>  |
| <i>Cynara cardunculus</i> L. subsp. <i>scolymus</i> (L.) Hegi (Asteraceae)     | Carciofo                                    | Flower buds   |                                                                         | Oral                           | <b>Med:</b> digestive                                         | <b>1</b>  |
| <i>Ecballium elaterium</i> (L.) A.Rich (Cucurbitaceae) AV-030                  | Cocomero asinino, Scattapiatti, Cucuruzzuli | Fruit         | A cotton swab is soaked in the fruit juice and inhaled through the nose | Inhalation                     | <b>Med:</b> liver depurative                                  | <b>1</b>  |
|                                                                                |                                             |               |                                                                         |                                | <b>Med:</b> sinusitis, cold                                   | <b>3</b>  |
|                                                                                |                                             |               |                                                                         |                                | <b>Med:</b> conjunctivitis                                    | <b>1</b>  |
|                                                                                |                                             |               |                                                                         |                                | <b>Med:</b> otitis                                            | <b>1</b>  |
|                                                                                |                                             |               |                                                                         |                                | <b>Med:</b> sniffed to sleep                                  | <b>1</b>  |
| <i>Cynodon dactylon</i> L. (Poaceae) AV-031                                    | Gramigna, Ramegna                           | Rhizome       | Decoction (with bay laurel leaves, mauve leaves and chamomile flowers)  | Oral                           | <b>Med:</b> bellyache                                         | <b>2</b>  |
|                                                                                |                                             |               | Decoction                                                               |                                | <b>Med:</b> diuretic, cystitis, gout                          | <b>5</b>  |
|                                                                                |                                             |               |                                                                         |                                | <b>Med:</b> back pain, toothache                              | <b>1</b>  |
|                                                                                |                                             |               |                                                                         |                                | <b>Med:</b> blood depurative                                  | <b>1</b>  |
|                                                                                |                                             |               |                                                                         |                                | <b>Med:</b> rheumatism                                        | <b>1</b>  |
|                                                                                |                                             |               |                                                                         | Topical                        | <b>Med:</b> eczema                                            | <b>1</b>  |
|                                                                                |                                             |               |                                                                         | In the horses and rabbits feed | <b>Vet:</b> make the coat shinier, increase the immune system | <b>3</b>  |

|                                                              |                                                 |             |                                                                                         |         |                                                |    |
|--------------------------------------------------------------|-------------------------------------------------|-------------|-----------------------------------------------------------------------------------------|---------|------------------------------------------------|----|
|                                                              |                                                 |             | Boiled                                                                                  |         | <b>Cul:</b> base for jellies, alcohol and beer | 1  |
| <i>Diplotaxis tenuifolia</i> (L.) DC. (Brassicaceae) AV-032  | Rucola                                          | Leaves      |                                                                                         |         | <b>Cul:</b> salads, pasta condiment            | 8  |
| <i>Eriobotrya japonica</i> (Thunb.) Lindl. (Rosaceae) AV-033 | Nespolo                                         | Flowers     | Decoction                                                                               | Oral    | <b>Med:</b> flu, cold                          | 2  |
| <i>Ficus carica</i> L. (Moraceae) AV-034                     | Fico                                            | Latex       | Raw                                                                                     | Topical | <b>Med:</b> insect bites                       | 5  |
|                                                              |                                                 | Fruits      |                                                                                         |         | <b>Med:</b> warts, skin fibroids               | 2  |
|                                                              |                                                 |             |                                                                                         |         | <b>Cul:</b> jam                                | 1  |
|                                                              |                                                 |             |                                                                                         |         | <b>Cul:</b> grappa aromatizer                  | 1  |
| <i>Foeniculum vulgare</i> Mill. (Apiaceae) AV-035            | Finocchietto, Finocchio selvatico, Finocchiasco | Fruits      | Decoction                                                                               | Oral    | <b>Med:</b> bellyache                          | 5  |
|                                                              |                                                 |             |                                                                                         |         | <b>Med:</b> toothache                          | 2  |
|                                                              |                                                 |             |                                                                                         |         | <b>Med:</b> digestive                          | 3  |
|                                                              |                                                 |             |                                                                                         |         | <b>Med:</b> diuretic                           | 1  |
|                                                              |                                                 |             |                                                                                         |         | <b>Med:</b> flu                                | 1  |
|                                                              |                                                 |             |                                                                                         |         | <b>Med:</b> cold                               | 2  |
|                                                              |                                                 |             |                                                                                         |         | <b>Med:</b> sore throat                        | 1  |
|                                                              |                                                 |             |                                                                                         |         | <b>Med:</b> sedative                           | 1  |
|                                                              |                                                 | Fruits      |                                                                                         |         | <b>Cul:</b> liqueur                            | 3  |
|                                                              |                                                 |             |                                                                                         |         | <b>Cul:</b> aromatizer in taralli and salami   | 17 |
|                                                              |                                                 | Leaves      |                                                                                         |         | <b>Cul:</b> as vegetable                       | 1  |
| <i>Genista tinctoria</i> L. (Fabaceae) AV-036                | Ginestra, Inesta, Ianesta                       | Flowers     | Raw                                                                                     | Topical | <b>Med:</b> nosebleed                          | 1  |
|                                                              |                                                 | Stems       |                                                                                         |         | <b>Dom:</b> brooms                             | 2  |
|                                                              |                                                 |             |                                                                                         |         | <b>Dom:</b> to make clothes                    | 3  |
| <i>Glaucium flavum</i> Crantz (Papaveraceae) AV-037          | Papagno giallo                                  | Whole plant | Decoction                                                                               | Oral    | <b>Med:</b> insomnia                           | 1  |
| <i>Hedera helix</i> L. (Araliaceae) AV-038                   | Edera                                           | Leaves      | Infusion                                                                                | Oral    | <b>Med:</b> bronchitis                         | 1  |
|                                                              |                                                 |             | Maceration in olive oil                                                                 | Topical | <b>Med:</b> burns                              | 1  |
|                                                              |                                                 |             | Leaves put in warm tub water before bathing at least twice a week                       |         | <b>Med:</b> stretch marks and cellulite        | 2  |
|                                                              |                                                 |             | Decoction (the filtered water is used to rinse the hair after shampooing)               |         | <b>Cos:</b> darken hair                        | 1  |
|                                                              |                                                 |             | Decoction (the garments are soaked in filtered water)                                   |         | <b>Dom:</b> prevent wool felting               | 1  |
| <i>Hedysarum coronarium</i> L. (Fabaceae) AV-039             | Sulla                                           | Leaf rachis | Chewed raw                                                                              | Oral    | <b>Med:</b> for refreshment during field work  | 1  |
| <i>Hordeum vulgare</i> L. (Poaceae) AV-040                   | Orzo                                            | Fruits      | Boiled with oats, the water is drunk warm                                               | Oral    | <b>Med:</b> cough                              | 3  |
|                                                              |                                                 |             | The caryopsis are roasted and ground, then boiled and filtered, sometimes oats is added |         | <b>Med:</b> sore throat                        | 4  |
|                                                              |                                                 |             | Decoction                                                                               |         | <b>Med:</b> cold                               | 1  |

|                                                                                                                   |                                           |                    |                                                                                                                              |         |                                                                                         |    |
|-------------------------------------------------------------------------------------------------------------------|-------------------------------------------|--------------------|------------------------------------------------------------------------------------------------------------------------------|---------|-----------------------------------------------------------------------------------------|----|
| <i>Hypericum perforatum</i> L.<br>(Hypericaceae) AV-041                                                           | Iperico, Evera de riumo (erba del rumine) | Petals             | Boiled with oats                                                                                                             |         | <b>Med:</b> calming for children                                                        | 2  |
|                                                                                                                   |                                           |                    | Maceration in olive oil                                                                                                      | Topical | <b>Med:</b> burns                                                                       | 1  |
| <i>Junglans regia</i> L.<br>(Juglandaceae) AV-042                                                                 | Noce                                      | Whole plant        | Decoction                                                                                                                    | Oral    | <b>Vet:</b> free the cows' rumen                                                        | 2  |
|                                                                                                                   |                                           | Fruits             | Liquor                                                                                                                       | Oral    | <b>Med:</b> stomach ache, digestive                                                     | 10 |
|                                                                                                                   |                                           |                    | Liquor                                                                                                                       | Oral    | <b>Cul:</b> liqueur                                                                     | 5  |
|                                                                                                                   |                                           |                    | Minced walnut green husk                                                                                                     | Topical | <b>Cos:</b> to dye hair                                                                 | 2  |
|                                                                                                                   |                                           | Wood               |                                                                                                                              |         | <b>Dom:</b> barrels for transporting water                                              | 3  |
| <i>Lactuca sativa</i> L.<br>(Asteraceae) AV-043                                                                   | Lattuga                                   | Leaves             | Decoction with <i>Matricaria chamomilla</i>                                                                                  | Topical | <b>Med:</b> conjunctivitis                                                              | 1  |
|                                                                                                                   |                                           | Leaves             | Decoction                                                                                                                    |         | <b>Med:</b> mouthwash                                                                   | 1  |
| <i>Lactuca sativa</i> subsp. <i>serriola</i><br>(L.) Galasso, Banfi, Bartolucci & Ardenghi<br>(Asteraceae) AV-044 | Scarola selvatica                         | Leaves             | Boiled leaves applied on tooth                                                                                               |         | <b>Med:</b> toothache                                                                   | 3  |
|                                                                                                                   |                                           | Leaves             | Decoction                                                                                                                    | Oral    | <b>Med:</b> diuretic                                                                    | 1  |
|                                                                                                                   |                                           |                    |                                                                                                                              |         | <b>Cul:</b> as vegetable in pizzas and soups                                            | 6  |
|                                                                                                                   |                                           |                    |                                                                                                                              |         | <b>Cul:</b> soups                                                                       | 4  |
|                                                                                                                   |                                           |                    |                                                                                                                              |         | <b>Med:</b> digestive                                                                   | 3  |
| <i>Lathyrus sativus</i> L.<br>(Fabaceae) AV-045<br><i>Laurus nobilis</i> L.<br>(Lauraceae) AV-046                 | Cicerchie, Chicherche                     | Seeds              |                                                                                                                              | Oral    |                                                                                         |    |
|                                                                                                                   |                                           | Leaves             | Liquor                                                                                                                       | Oral    | <b>Med:</b> digestive                                                                   | 3  |
|                                                                                                                   | Alloro, Lauro                             |                    | Infusion                                                                                                                     |         | <b>Med:</b> digestive                                                                   | 3  |
|                                                                                                                   |                                           |                    | Decoction (with <i>Salvia rosmarinus</i> and <i>S. officinalis</i> leaves)                                                   |         | <b>Med:</b> flu                                                                         | 4  |
|                                                                                                                   |                                           |                    | Decoction                                                                                                                    |         | <b>Med:</b> calming                                                                     | 2  |
|                                                                                                                   |                                           |                    |                                                                                                                              |         | <b>Med:</b> stomach ache                                                                | 1  |
|                                                                                                                   |                                           |                    |                                                                                                                              |         | <b>Med:</b> analgesic                                                                   | 1  |
|                                                                                                                   |                                           |                    | Decoction (with <i>Malus domestica</i> and <i>Prunus armeniaca</i> leaves and <i>Tilia cordata</i> flowers)                  |         | <b>Med:</b> sore throat                                                                 | 2  |
|                                                                                                                   |                                           |                    | Decoction with <i>Cynodon dactylon</i> roots, <i>Malva sylvestris</i> leaves and <i>Matricaria chamomilla</i> inflorescences |         | <b>Med:</b> bellyache (including dysmenorrhea pains)                                    | 2  |
|                                                                                                                   |                                           | Fruits             | Oil obtained by the fruits                                                                                                   | Topical | <b>Med:</b> rheumatism                                                                  | 2  |
|                                                                                                                   |                                           |                    |                                                                                                                              |         | <b>Cul:</b> to season boiled chestnuts, roast meats, jellied pork, pork liver, sausages | 15 |
|                                                                                                                   |                                           |                    |                                                                                                                              |         | <b>Med:</b> calming                                                                     | 1  |
| <i>Lavandula angustifolia</i> L.<br>(Lamiaceae) AV-047                                                            | Lavanda                                   | Flowers and Leaves | Infusion                                                                                                                     | Oral    |                                                                                         |    |

|                                                                                 |                             |                     |                                                                                                             |            |                                                      |           |
|---------------------------------------------------------------------------------|-----------------------------|---------------------|-------------------------------------------------------------------------------------------------------------|------------|------------------------------------------------------|-----------|
|                                                                                 |                             | Aerial parts        |                                                                                                             |            | <b>Dom:</b> to perfume clothes and domestic spaces   | <b>1</b>  |
| <i>Linum usitatissimum</i> L.<br>(Linaceae) AV-048                              | Lino                        | Seeds               | Oil obtained by the seeds                                                                                   | Topical    | <b>Med:</b> burns                                    | <b>2</b>  |
| <i>Logfia gallica</i> (L.) Cosson & Germ.<br>(Asteraceae) AV-049                | Bambagia, Vammace           | Flower buds         | The cotton wool of flower buds                                                                              | Topical    | <b>Med:</b> skin disinfectant                        | <b>1</b>  |
| <i>Malus domestica</i> Borkh.<br>(Rosaceae) AV-050                              | Mele                        | Leaves              | Decoction with laurel and apricot leaves and linden flowers                                                 | Oral       | <b>Med:</b> sore throat                              | <b>2</b>  |
|                                                                                 |                             | Fruits              | Boiled slices with vinegar                                                                                  | Topical    | <b>Med:</b> skin imperfections, cellulitis           | <b>1</b>  |
| <i>Malva sylvestris</i> L.; <i>M. neglecta</i> Wallr.<br>(Malvaceae) AV-051-052 | Malva, Mareva               | Leaves, Roots       | Decoction                                                                                                   | Oral       | <b>Med:</b> toothache                                | <b>3</b>  |
|                                                                                 |                             |                     |                                                                                                             |            | <b>Med:</b> ovary inflammation                       | <b>1</b>  |
|                                                                                 |                             |                     |                                                                                                             |            | <b>Med:</b> diuretic                                 | <b>2</b>  |
|                                                                                 |                             | Aerial parts        | Raw                                                                                                         | Topical    | <b>Med:</b> gingivitis                               | <b>2</b>  |
|                                                                                 |                             |                     | Decoction with <i>Cynodon dactylon</i> roots and <i>Matricaria chamomilla</i> inflorescences                | Oral       | <b>Med:</b> bellyache                                | <b>14</b> |
|                                                                                 |                             |                     | Decoction                                                                                                   |            | <b>Med:</b> stomach ache, digestive                  | <b>10</b> |
|                                                                                 |                             |                     |                                                                                                             |            | <b>Med:</b> flu, cold, cough                         | <b>11</b> |
|                                                                                 |                             |                     |                                                                                                             |            | <b>Med:</b> sore throat                              | <b>3</b>  |
|                                                                                 |                             |                     |                                                                                                             |            | <b>Med:</b> cystitis                                 | <b>2</b>  |
|                                                                                 |                             |                     |                                                                                                             |            | <b>Med:</b> calming                                  | <b>4</b>  |
|                                                                                 |                             |                     | Boiled                                                                                                      | Inhalation | <b>Med:</b> headache                                 | <b>1</b>  |
|                                                                                 |                             |                     |                                                                                                             |            | <b>Med:</b> pimples                                  | <b>1</b>  |
|                                                                                 |                             |                     |                                                                                                             | Topical    | <b>Med:</b> wound healings                           | <b>1</b>  |
|                                                                                 |                             | Leaves              | Three parts of chopped leaves are boiled with four parts of butter until all the watery part has evaporated | Topical    | <b>Cos:</b> anti-wrinkle                             | <b>1</b>  |
|                                                                                 |                             | Whole plant         | Decoction of mallow with bran and cornmeal                                                                  | Oral       | <b>Vet:</b> to promote the expulsion of the placenta | <b>1</b>  |
| <i>Marrubium vulgare</i> L.<br>(Lamiaceae) AV-053                               | Marrubio, Marugia, Maruggia | Flowering tops      | Infusion                                                                                                    | Oral       | <b>Med:</b> flu                                      | <b>3</b>  |
|                                                                                 |                             |                     |                                                                                                             |            | <b>Med:</b> bellyache                                | <b>1</b>  |
|                                                                                 |                             |                     |                                                                                                             |            | <b>Med:</b> asthma and cough                         | <b>1</b>  |
|                                                                                 |                             | Whole plant         |                                                                                                             |            | <b>Med:</b> calming                                  | <b>1</b>  |
|                                                                                 |                             |                     | Boiled                                                                                                      | Topical    | <b>Med:</b> skin infections                          | <b>2</b>  |
|                                                                                 |                             |                     | Boiled                                                                                                      | Topical    | <b>Vet:</b> skin infections                          | <b>3</b>  |
| <i>Matricaria chamomilla</i> L.<br>(Asteraceae) AV-054                          | Camomilla, Capommilla       | Flowerheads, leaves | Infusion                                                                                                    | Oral       | <b>Med:</b> stomach ache                             | <b>12</b> |
|                                                                                 |                             |                     |                                                                                                             |            | <b>Med:</b> bellyache                                | <b>19</b> |

|                                                                                                     |                          |         |                                                                           |         |                                           |    |
|-----------------------------------------------------------------------------------------------------|--------------------------|---------|---------------------------------------------------------------------------|---------|-------------------------------------------|----|
|                                                                                                     |                          |         |                                                                           |         | <b>Med:</b> calming                       | 7  |
|                                                                                                     |                          |         |                                                                           |         | <b>Med:</b> flu                           | 3  |
|                                                                                                     |                          |         |                                                                           |         | <b>Med:</b> toothache                     | 1  |
|                                                                                                     |                          |         |                                                                           |         | <b>Med:</b> headache                      | 1  |
|                                                                                                     |                          |         |                                                                           |         | <b>Med:</b> sore throat                   | 1  |
|                                                                                                     |                          |         | Compresses (also decoction with <i>Lactuca sativa</i> leaves)<br>Infusion | Topical | <b>Med:</b> dysmenorrhea                  | 4  |
|                                                                                                     |                          |         |                                                                           |         | <b>Med:</b> conjunctivitis                | 5  |
|                                                                                                     |                          |         |                                                                           |         | <b>Cos:</b> lighten hair                  | 1  |
|                                                                                                     |                          |         |                                                                           |         | <b>Med:</b> antibacterial                 | 1  |
|                                                                                                     |                          |         |                                                                           |         | <b>Cul:</b> for flavoring sauces          | 18 |
| <i>Medicago sativa</i> L.<br>(Fabaceae) AV-055                                                      | Poliero, Pulejo, Puliero | Leaves  | Raw                                                                       | Oral    | <b>Med:</b>                               | 2  |
| <i>Mentha pulegium</i> L.<br>(Lamiaceae) AV-056                                                     |                          | Leaves  |                                                                           | Oral    | <b>Cul:</b> for                           | 18 |
| <i>Mentha spicata</i> L.; <i>M. suaveolens</i> Ehrh. subsp. <i>suaevolens</i><br>(Lamiaceae) AV-057 | Menta                    | Leaves  | Raw leaves chewed                                                         | Oral    | <b>Med:</b> halitosis                     | 2  |
|                                                                                                     |                          |         | In ice cold water                                                         |         | <b>Med:</b> refreshing                    | 2  |
|                                                                                                     |                          |         |                                                                           |         | <b>Cul:</b> for flavoring salads and meat | 8  |
| <i>Mercurialis annua</i> L.<br>(Euphorbiaceae) AV-058                                               | Mercurella, Mercorella   | Leaves  | Decoction                                                                 | Oral    | <b>Med:</b> intestinal problems, laxative | 2  |
|                                                                                                     |                          |         |                                                                           |         | <b>Vet:</b> intestinal problems           | 1  |
| <i>Musa</i> spp. (Musaceae)                                                                         | Banana                   | Epicarp | Raw                                                                       | Topical | <b>Med:</b> eye swelling                  | 1  |
| <i>Ocimum basilicum</i> L.<br>(Lamiaceae) AV-059                                                    | Basilico, Vasenicola     | Leaves  | Raw leaves rubbed on skin                                                 | Topical | <b>Med:</b> keep mosquitoes away          | 1  |
| <i>Olea europaea</i> L.<br>(Oleaceae) AV-060                                                        |                          | Fruits  | Oil                                                                       | Topical | <b>Med:</b> earache                       | 1  |
|                                                                                                     |                          |         |                                                                           |         | <b>Med:</b> to remove calluses            | 1  |
|                                                                                                     |                          |         |                                                                           |         | <b>Med:</b> burns, wound healing          | 2  |
|                                                                                                     |                          | Leaves  | Decoction                                                                 | Oral    | <b>Med:</b> high blood pressure           | 2  |
|                                                                                                     |                          | Fruits  | Oil in which river fish were fried                                        | Topical | <b>Cos:</b> to regrow hair                | 1  |
|                                                                                                     |                          | Fruits  | Oil                                                                       |         | <b>Dom:</b> to make soap                  | 2  |
| <i>Onobrychis viciifolia</i> Scop.<br>(Fabaceae) AV-061                                             | Lupinella                | Leaves  |                                                                           |         | <b>Cul:</b> as vegetable                  | 1  |
| <i>Ononis spinosa</i> L.<br>(Fabaceae) AV-062                                                       | Ominite, Spina olivella  | Roots   | Decoction                                                                 | Oral    | <b>Med:</b> rheumatism                    | 1  |
| <i>Origanum vulgare</i> L. subsp. <i>viridulum</i> (Martrin-Donos)<br>Nyman<br>(Lamiaceae) AV-063   | Origano, Arechena        | Leaves  | Decoction                                                                 | Oral    | <b>Med:</b> dysentery                     | 1  |
|                                                                                                     |                          |         | Decoction                                                                 | Topical | <b>Med:</b> pediculosis                   | 2  |
|                                                                                                     |                          |         | Maceration in olive oil                                                   | Topical | <b>Med:</b> rheumatism                    | 3  |
|                                                                                                     |                          |         | Maceration in alcohol                                                     |         | <b>Med:</b> toothache                     | 1  |
|                                                                                                     |                          |         | Decoction in red wine                                                     | Topical | <b>Med:</b> stiff neck                    | 2  |



|                                                                                      |                                    |                      |                                                                                                           |         |                                                                                                   |    |
|--------------------------------------------------------------------------------------|------------------------------------|----------------------|-----------------------------------------------------------------------------------------------------------|---------|---------------------------------------------------------------------------------------------------|----|
|                                                                                      |                                    | Stems                |                                                                                                           | Topical | <b>Med:</b> in the pierced ears to keep the hole from closing and prevent infections              | 1  |
|                                                                                      |                                    | Flowering tops       |                                                                                                           |         | <b>Cul:</b> To flavor poultry, fish, and other dishes as a spice in tomato based sauces or salads | 5  |
| <i>Panicum miliaceum</i> L.<br>(Poaceae) AV-064                                      | Miglio                             | Stems                |                                                                                                           |         | <b>Dom:</b> brooms                                                                                | 7  |
|                                                                                      |                                    | Fruits               | Boiled                                                                                                    |         | <b>Cos:</b> hair masks                                                                            | 1  |
|                                                                                      |                                    | Seeds                |                                                                                                           |         | <b>Vet:</b> fodder                                                                                | 1  |
| <i>Papaver rhoeas</i> L.<br>(Papaveraceae) AV-065                                    | Papagno rosso, Rosolaccio          | Aerial parts, Fruits | Boiled                                                                                                    | Oral    | <b>Med:</b> soporific for children                                                                | 11 |
|                                                                                      |                                    | Leaves               |                                                                                                           |         | <b>Cul:</b> as vegetable                                                                          | 1  |
| <i>Parietaria judaica</i> L.<br>(Urticaceae) AV-066                                  | Paretaria, Evera è muro, Vetraiola | Leaves               | Decoction                                                                                                 | Oral    | <b>Med:</b> abortive                                                                              | 1  |
|                                                                                      |                                    |                      |                                                                                                           |         | <b>Med:</b> respiratory system                                                                    | 2  |
|                                                                                      |                                    |                      |                                                                                                           |         | <b>Med:</b> hepatomegaly                                                                          | 3  |
|                                                                                      |                                    |                      |                                                                                                           |         | <b>Med:</b> jaundice                                                                              | 1  |
|                                                                                      |                                    |                      |                                                                                                           |         | <b>Med:</b> kidney stones                                                                         | 1  |
|                                                                                      |                                    |                      |                                                                                                           |         | <b>Med:</b> cystitis                                                                              | 1  |
|                                                                                      |                                    |                      | Cataplasms                                                                                                | Topical | <b>Med:</b> wound healing, burns, herpes zoster, rhagades                                         | 6  |
|                                                                                      |                                    |                      | Leaves between the bandages soaked in egg white to block the fractures                                    |         | <b>Med:</b> fractures                                                                             | 2  |
|                                                                                      |                                    |                      |                                                                                                           |         | <b>Dom:</b> to clean bottles and clothing                                                         | 4  |
| <i>Petasites hybridus</i> (L.)<br>G.Gaertn., B.Mey. & Scherb.<br>(Asteraceae) AV-067 | Lappazzio, Lapazio, Farfaraccio    | Leaves               | Raw                                                                                                       | Topical | <b>Med:</b> pimples                                                                               | 3  |
| <i>Petroselinum crispum</i> (Mill.)<br>Fuss<br>(Apiaceae) AV-068                     | Prezzemolo, Pretusino              | Leaves               | Juice                                                                                                     | Oral    | <b>Med:</b> abortive                                                                              | 2  |
| <i>Populus nigra</i> L., <i>P. alba</i> L.<br>(Salicaceae) AV-069                    | Pioppo                             | Stems                |                                                                                                           |         | <b>Dom:</b> to make flutes                                                                        | 1  |
| <i>Portulaca oleracea</i> L.<br>(Portulacaceae) AV-070                               | Cientofrunnelle, Pucchiacchella    | Leaves               |                                                                                                           |         | <b>Cul:</b> salads                                                                                | 10 |
| <i>Prunus avium</i> L.; <i>P. persica</i><br>Batch<br>(Rosaceae) AV-071              |                                    | Leaves, stems        | Decoction                                                                                                 | Oral    | <b>Med:</b> headache                                                                              | 1  |
| <i>Prunus armeniaca</i> L.<br>(Rosaceae) AV-072                                      | Albicocche                         | Leaves               | Decoction with <i>Malus domestica</i> and <i>Prunus armeniaca</i> leaves and <i>Tilia cordata</i> flowers | Oral    | <b>Med:</b> sore throat                                                                           | 2  |
| <i>Prunus spinosa</i> L.<br>(Rosaceae) AV-073                                        | Prugnolo, Trigne                   | Fruits               | Liquor                                                                                                    | Oral    | <b>Med:</b> flu                                                                                   | 2  |
| <i>Punica granatum</i> L.<br>(Lythraceae) AV-074                                     | Melograno                          | Seeds                | Syrup                                                                                                     | Oral    | <b>Med:</b> refreshing, invigorating                                                              | 3  |
|                                                                                      |                                    | Epicarp              | Boiled                                                                                                    |         | <b>Med:</b> dysentery                                                                             | 1  |

|                                                                              |                |              |                                                                         |                  |                                             |   |
|------------------------------------------------------------------------------|----------------|--------------|-------------------------------------------------------------------------|------------------|---------------------------------------------|---|
| <i>Ricinus communis</i> L.<br>(Euphorbiaceae) AV-075                         | Ricino         | Seeds        | Raw                                                                     | Topical          | <b>Med:</b> gingivitis                      | 1 |
|                                                                              |                | Seeds        | Oil                                                                     | Oral             | <b>Med:</b> bellyache                       | 1 |
| <i>Robinia pseudoacacia</i> L.<br>(Fabaceae) AV-076                          | Acacia         | Flowers      |                                                                         |                  | <b>Cul:</b> fritters                        | 1 |
| <i>Rosa canina</i> L.<br>(Rosaceae) AV-077                                   | Rosa           | Fruits       | Decoction                                                               | Oral             | <b>Med:</b> vitamin C supplement            | 1 |
|                                                                              |                | Leaves       | Decoction, liquor                                                       | Oral             | <b>Med:</b> flu                             | 3 |
|                                                                              |                | Fruits       | Raw                                                                     | Topical          | <b>Med:</b> gingivitis                      | 1 |
|                                                                              |                |              |                                                                         |                  | <b>Cul:</b> jam                             | 1 |
|                                                                              |                | Flowers      | Boiled                                                                  |                  | <b>Dom:</b> to dye fabrics                  | 1 |
| <i>Rubus ulmifolius</i> Schott<br>(Rosaceae) AV-078                          | More, Rovi     | Fruits       | Liquor                                                                  | Oral             | <b>Med:</b> digestive                       | 1 |
|                                                                              |                |              |                                                                         |                  | <b>Med:</b> flu                             | 1 |
|                                                                              |                | Leaves       | Raw                                                                     | Topical          | <b>Med:</b> pimples                         | 3 |
|                                                                              |                | Stems        |                                                                         |                  | <b>Dom:</b> brooms                          | 1 |
|                                                                              |                | Fruits       |                                                                         |                  | <b>Cul:</b> jam                             | 4 |
| <i>Rumex crispus</i> L.<br>(Polygonaceae) AV-079                             | Lingue di cane | Stems        | Infusion                                                                | Oral             | <b>Vet:</b> coryza of hens                  | 1 |
|                                                                              |                | Fruits       |                                                                         |                  | <b>Med:</b> pimples                         | 2 |
|                                                                              |                | Stems        |                                                                         |                  |                                             |   |
|                                                                              |                | Leaves       | Raw                                                                     | Topical          |                                             |   |
|                                                                              |                |              |                                                                         |                  |                                             |   |
|                                                                              |                |              |                                                                         |                  |                                             |   |
|                                                                              |                |              |                                                                         |                  |                                             |   |
|                                                                              |                |              |                                                                         |                  |                                             |   |
|                                                                              |                |              |                                                                         |                  |                                             |   |
|                                                                              |                |              |                                                                         |                  |                                             |   |
|                                                                              |                |              |                                                                         |                  |                                             |   |
|                                                                              |                |              |                                                                         |                  |                                             |   |
| <i>Ruta graveolens</i> L.; <i>R. chalepensis</i> L.<br>(Rutaceae) AV-080-081 | Ruta           | Aerial parts | Raw, infusion, liquor                                                   | Oral             | <b>Med:</b> flu, cold, cough                | 5 |
|                                                                              |                |              |                                                                         |                  |                                             |   |
|                                                                              |                |              | Ground with garlic and filtered                                         | Oral             | <b>Med:</b> stomach ache                    | 5 |
|                                                                              |                |              |                                                                         |                  |                                             |   |
|                                                                              |                | Leaves       | Raw, infusion                                                           | Oral, inhalation | <b>Med:</b> bellyache                       | 2 |
|                                                                              |                |              | Decoction                                                               | Oral             | <b>Med:</b> colitis                         | 1 |
|                                                                              |                |              |                                                                         |                  | <b>Med:</b> menstrual disorders             | 1 |
|                                                                              |                |              |                                                                         |                  | <b>Med:</b> arthritis                       | 1 |
|                                                                              |                |              |                                                                         |                  | <b>Med:</b> abortive                        | 1 |
|                                                                              |                |              | Raw                                                                     |                  | <b>Med:</b> ringworms                       | 4 |
|                                                                              |                |              |                                                                         |                  | <b>Med:</b> invigorating                    | 1 |
|                                                                              |                |              | Boiled                                                                  | Topical          | <b>Med:</b> toothache                       | 4 |
| <i>Salix alba</i> L.<br>(Salicaceae) AV-082                                  | Salice         |              | Raw                                                                     |                  | <b>Med:</b> eye swelling, to improve vision | 2 |
|                                                                              |                |              |                                                                         |                  | <b>Med:</b> bruises                         | 1 |
|                                                                              |                | Whole plant  | Fried in olive oil                                                      |                  | <b>Dom:</b> baskets                         | 5 |
|                                                                              |                | Stems        |                                                                         |                  |                                             |   |
|                                                                              |                |              |                                                                         |                  | <b>Dom:</b> to tie the vine to the posts    | 2 |
|                                                                              |                |              |                                                                         |                  | <b>Dom:</b> to make brooms                  | 1 |
|                                                                              |                |              |                                                                         |                  | <b>Dom:</b> to make flutes                  | 2 |
|                                                                              |                |              |                                                                         |                  |                                             |   |
|                                                                              |                |              |                                                                         |                  |                                             |   |
|                                                                              |                |              |                                                                         |                  |                                             |   |
|                                                                              |                |              |                                                                         |                  |                                             |   |
|                                                                              |                |              |                                                                         |                  |                                             |   |
| <i>Salvia officinalis</i> L.<br>(Lamiaceae) AV-083                           | Salvia         | Leaves       | Infusion with <i>Laurus nobilis</i> and <i>Salvia rosmarinus</i> leaves | Oral             | <b>Med:</b> flu                             | 2 |
|                                                                              |                |              |                                                                         |                  |                                             |   |
|                                                                              |                |              | Infusion                                                                |                  | <b>Med:</b> asthma                          | 1 |
|                                                                              |                |              | Decoction with lemon juice                                              |                  | <b>Med:</b> digestive, stomach ache         | 1 |
|                                                                              |                |              | Raw                                                                     |                  | <b>Med:</b> halitosis                       | 4 |

|                                                                                                                     |                                           |                    |                                                                                |               |                                                       |                                          |                                            |   |  |
|---------------------------------------------------------------------------------------------------------------------|-------------------------------------------|--------------------|--------------------------------------------------------------------------------|---------------|-------------------------------------------------------|------------------------------------------|--------------------------------------------|---|--|
| <i>Salvia rosmarinus</i> Schleid.<br>(Lamiaceae) AV-084                                                             | Rosmarino,<br>Spinaddosso,<br>Spigaddosso | Flowers,<br>Leaves | Decoction                                                                      | Oral, topical | <b>Med:</b> sore throat                               | 3                                        |                                            |   |  |
|                                                                                                                     |                                           |                    | Boiled                                                                         | Topical       | <b>Med:</b> toothache,<br>whiten teeth                | 3                                        |                                            |   |  |
|                                                                                                                     |                                           |                    | Infusion (the filtered water is<br>used to rinse the hair after<br>shampooing) |               | <b>Cos:</b> darken hair                               | 1                                        |                                            |   |  |
|                                                                                                                     |                                           |                    |                                                                                |               | <b>Cul:</b> flavoring,<br>fritters                    | 7                                        |                                            |   |  |
|                                                                                                                     |                                           |                    | Infusion with <i>Laurus nobilis</i> and<br><i>Salvia officinalis</i> leaves    | Oral          | <b>Med:</b> cold, flu                                 | 3                                        |                                            |   |  |
| <i>Sambucus nigra</i> L.<br>(Caprifoliaceae) AV-085                                                                 | Sambuco, Saucco,<br>Saucu, Parmiccole     | Leaves             | Boiled                                                                         | Inhalation    | <b>Med:</b> cold                                      | 1                                        |                                            |   |  |
|                                                                                                                     |                                           | Flowers            | Decoction with <i>Laurus nobilis</i><br>leaves                                 | Oral          | <b>Med:</b> digestive                                 | 1                                        |                                            |   |  |
|                                                                                                                     |                                           | Leaves             |                                                                                |               | <b>Cul:</b> flavoring<br>for meat roasts<br>and pasta | 9                                        |                                            |   |  |
|                                                                                                                     |                                           | Aerial parts       | Liquor                                                                         | Oral          | <b>Med:</b> flu                                       | 2                                        |                                            |   |  |
|                                                                                                                     |                                           |                    | Decoction                                                                      |               | <b>Med:</b> cold, flu                                 | 3                                        |                                            |   |  |
| <i>Sambucus ebulus</i> L.<br>(Caprifoliaceae) AV-087<br><i>Saponaria officinalis</i> L.<br>(Caryophyllaceae) AV-088 | Saucu elleboro<br>Erba della schiuma      |                    | Crushed with garlic                                                            | Topical       | <b>Med:</b> burns                                     | 1                                        |                                            |   |  |
|                                                                                                                     |                                           |                    | Leaves                                                                         | Boiled        |                                                       | <b>Med:</b> leg<br>swelling,<br>mastitis | 3                                          |   |  |
|                                                                                                                     |                                           |                    | Flowers                                                                        | Boiled        |                                                       | <b>Med:</b><br>rheumatism                | 1                                          |   |  |
|                                                                                                                     |                                           |                    |                                                                                | Infusion      |                                                       | <b>Med:</b> styne                        | 1                                          |   |  |
|                                                                                                                     |                                           |                    |                                                                                |               | Oral                                                  | <b>Med:</b> excessive<br>sweating        | 1                                          |   |  |
|                                                                                                                     |                                           |                    | Bark                                                                           |               |                                                       |                                          | <b>Med:</b> cough,<br>anti<br>inflammatory | 3 |  |
|                                                                                                                     |                                           |                    |                                                                                |               |                                                       |                                          | <b>Med:</b> bellyache                      | 2 |  |
|                                                                                                                     |                                           |                    |                                                                                |               | Boiled                                                | Inhalation                               | <b>Med:</b> cold                           | 2 |  |
|                                                                                                                     |                                           |                    |                                                                                | Poultices     | Topical                                               | <b>Med:</b> sprains                      | 2                                          |   |  |
|                                                                                                                     |                                           |                    |                                                                                | Flowers       |                                                       |                                          | <b>Cul:</b> fritters                       | 1 |  |
|                                                                                                                     |                                           |                    | Leaves                                                                         | Boiled        | Topical                                               | Topical                                  | <b>Vet:</b> mastitis                       | 2 |  |
|                                                                                                                     |                                           |                    |                                                                                |               |                                                       |                                          | <b>Vet:</b> animal coat<br>infections      | 2 |  |
|                                                                                                                     |                                           |                    |                                                                                |               |                                                       |                                          | <b>Dom:</b> ink                            | 1 |  |
|                                                                                                                     |                                           |                    |                                                                                |               |                                                       |                                          |                                            |   |  |
|                                                                                                                     |                                           |                    |                                                                                |               |                                                       |                                          |                                            |   |  |
| <i>Scolymus grandiflorus</i> Desf.<br>(Asteraceae) AV-089                                                           | Cardone                                   | Leaves, Stems      |                                                                                |               | <b>Cul:</b> as<br>vegetable                           | 2                                        |                                            |   |  |
| <i>Scolymus hispanicus</i> L. subsp.<br><i>hispanicus</i><br>(Asteraceae) AV-090                                    | Cardoncello                               | Leaves, Roots      |                                                                                |               | <b>Cul:</b> as<br>vegetable                           | 2                                        |                                            |   |  |
| <i>Sedum cepaea</i> L.<br>(Crassulaceae) AV-091                                                                     | Borracina                                 | Leaves             |                                                                                | Topical       | <b>Med:</b> wound<br>healing, burns                   | 7                                        |                                            |   |  |
| <i>Solanum melongena</i> L.<br>(Solanaceae)                                                                         | Melanzane                                 | Fruits             | Raw                                                                            | Topical       | <b>Med:</b><br>hemorrhoids                            | 1                                        |                                            |   |  |
| <i>Solanum tuberosum</i> L.<br>(Solanaceae)                                                                         | Patate                                    | Tuber              | Raw                                                                            | Topical       | <b>Med:</b> burns                                     | 5                                        |                                            |   |  |
|                                                                                                                     |                                           |                    |                                                                                |               | <b>Med:</b> headache                                  | 1                                        |                                            |   |  |

|                                                                                                                    |                                 |              |                                                               |         |                                     |           |
|--------------------------------------------------------------------------------------------------------------------|---------------------------------|--------------|---------------------------------------------------------------|---------|-------------------------------------|-----------|
| <i>Sonchus oleraceus</i> L.<br>(Asteraceae) AV-092                                                                 | Seone                           | Leaves       | Raw                                                           | Oral    | <b>Med:</b> stomach ache            | <b>2</b>  |
|                                                                                                                    |                                 |              | Decoction                                                     |         | <b>Med:</b> rheumatism              | <b>1</b>  |
|                                                                                                                    |                                 | Leaves       | Boiled, raw                                                   |         | <b>Med:</b> blood circulation       | <b>1</b>  |
|                                                                                                                    |                                 |              |                                                               |         | <b>Cul:</b> as vegetable            | <b>12</b> |
| <i>Sonchus asper</i> (L.) Hill subsp. <i>asper</i><br>(Asteraceae) AV-093                                          | Seone                           | Leaves       | Boiled                                                        |         | <b>Med:</b> diuretic                | <b>1</b>  |
| <i>Sonchus tenerrimus</i> L.<br>(Asteraceae) AV-094                                                                | Seone                           | Leaves       |                                                               |         | <b>Cul:</b> salads                  | <b>1</b>  |
| <i>Sorbus domestica</i> L.<br>(Rosaceae)                                                                           | Sorbe, Sorva                    | Fruits       |                                                               | Oral    | <b>Med:</b> laxative                | <b>1</b>  |
|                                                                                                                    |                                 |              |                                                               |         | <b>Cul:</b> jam                     | <b>1</b>  |
| <i>Sorghum bicolor</i> (L.) Moench<br>(Poaceae) AV-095                                                             | Saggina, Meleche                | Stems        |                                                               |         | <b>Dom:</b> brooms                  | <b>1</b>  |
| <i>Taraxacum campylodes</i> G.E.Haglund.<br>(Asteraceae) AV-096                                                    | Tarassaco                       | Aerial parts | Decoction                                                     | Oral    | <b>Med:</b> diuretic                | <b>3</b>  |
|                                                                                                                    |                                 | Aerial parts |                                                               |         | <b>Cul:</b> as vegetable            | <b>1</b>  |
| <i>Thymus pulegioides</i> L., <i>Th. longicaulis</i> C. Presl.<br>(Lamiaceae) AV-097                               | Timo                            | Leaves       |                                                               |         | <b>Cul:</b> aromatizer              | <b>2</b>  |
| <i>Tilia cordata</i> Mill., <i>T. platyphyllos</i> Scop.<br>(Malvaceae) AV-098                                     | Tiglio                          | Flowers      | Decoction                                                     | Oral    | <b>Med:</b> sore throat, flu, cold  | <b>7</b>  |
|                                                                                                                    |                                 |              |                                                               |         | <b>Med:</b> stomach ache            | <b>2</b>  |
|                                                                                                                    |                                 |              |                                                               |         | <b>Med:</b> calming                 | <b>3</b>  |
| <i>Triticum turgidum</i> L. subsp. <i>durum</i> (Desf.) Husn., <i>Triticum aestivum</i> L.<br>(Poaceae) AV-099-100 | Grano, Vrenna, Caniglia         | Fruits       | Toasted flour and bran in a stocking and applied to the cheek | Topical | <b>Med:</b> toothache               | <b>1</b>  |
|                                                                                                                    |                                 |              | Flour mixed with water and salt and applied on the sore part  |         | <b>Med:</b> sprains and contusions  | <b>1</b>  |
|                                                                                                                    |                                 |              | Toasted bran in a stocking and applied to the breast          |         | <b>Med:</b> pneumonia               | <b>1</b>  |
|                                                                                                                    |                                 |              | Bran mixed with egg whites                                    |         | <b>Med:</b> sprain                  | <b>3</b>  |
|                                                                                                                    |                                 |              | Bran mixed with an egg and applied on the legs                |         | <b>Med:</b> leg swelling            | <b>1</b>  |
|                                                                                                                    |                                 | Stems        | Hay                                                           |         | <b>Med:</b> leeks                   | <b>1</b>  |
|                                                                                                                    |                                 |              |                                                               |         | <b>Dom:</b> straws to drink liquids | <b>1</b>  |
| <i>Urtica membranacea</i> Poir., <i>U. dioica</i> L.<br>(Urticaceae) AV-101                                        | Ortica, Ordiche, Vurdica, Vicci | Roots        | Decoction                                                     | Topical | <b>Med:</b> eczema                  | <b>2</b>  |
|                                                                                                                    |                                 |              |                                                               | Oral    | <b>Med:</b> purify the blood        | <b>1</b>  |

|                                                           |                   |              |                                                                             |         |                                  |    |
|-----------------------------------------------------------|-------------------|--------------|-----------------------------------------------------------------------------|---------|----------------------------------|----|
|                                                           |                   | Leaves       | Raw                                                                         |         | <b>Med:</b> digestive            | 1  |
|                                                           |                   |              | Infusion                                                                    |         | <b>Med:</b> menstrual disorders  | 1  |
|                                                           |                   | Whole plant  | The painful parts are scourged with the stem of the freshly harvested plant | Topical | <b>Med:</b> hemorrhoids          | 1  |
|                                                           |                   |              |                                                                             |         | <b>Med:</b> rheumatism, sciatica | 1  |
|                                                           |                   | Leaves       | Infusion                                                                    | Topical | <b>Cos:</b> hair care            | 10 |
|                                                           |                   | Leaves       |                                                                             | Oral    | <b>Cos:</b> skin care            | 1  |
|                                                           |                   |              |                                                                             |         | <b>Cul:</b> as vegetable         | 10 |
|                                                           |                   |              | Decoction                                                                   |         | <b>Vet:</b> cure poultry         | 4  |
|                                                           |                   | Bark         | Raw                                                                         | Topical | <b>Med:</b> wound healing        | 8  |
|                                                           |                   |              |                                                                             |         | <b>Vet:</b> wound healing        | 2  |
| <i>Ulmus minor</i> Mill.<br>(Ulmaceae) AV-102             | Olmo, Puleja      |              |                                                                             |         | <b>Med:</b> calming              | 1  |
| <i>Valeriana officinalis</i> L.<br>(Valerianaceae) AV-103 | Valeriana         | Aerial parts | Decoction                                                                   | Oral    |                                  |    |
| <i>Vitis vinifera</i> L.<br>(Vitaceae)                    | Vite              | Fruits       | Boiled wine                                                                 | Oral    | <b>Med:</b> cold, cough          | 2  |
|                                                           |                   |              |                                                                             |         | <b>Cul:</b> vincotto             | 2  |
| <i>Zea mays</i> L.<br>(Poaceae) AV-104                    | Granone, Graulino | Bark         | Raw                                                                         |         | <b>Dom:</b> smoked               | 1  |
|                                                           |                   | Leaves       |                                                                             |         | <b>Dom:</b> mattress             | 1  |

---
